# Supplementary material for: QTL Mapping of Fruit and Seed-related Traits in Watermelon Using Genotyping-by-Sequencing-based High-density Linkage Mapping
Source: Research Square preprint supplement (doi:10.21203/rs.3.rs-107825/v1), 2020-11-24
Supplement: Supplementary file 1 [file 0dc51740ad86fa57118dd90c.xlsx]

## Sheet: Table S1
Table S1. Details of two experiments for phenotypic data collection with K2 × L1 F2 and F3 families over two years
Experiments	Year	Season and environments	Experiment design a	Traits investigated b
2016F2	2016	Summer (June to September), greenhouses	120 F2 plants, CRD	RSP, RC, FFC, FW, FD, FL, FSI, SL, SW, 20-SWT
2017F3	2017	Summer (June to September), open field	120 F3 families, CRBD	RSP, RC, FFC, FW, FD, FL, FSI,BCC, BCE
a CRD: completely randomized design; CRBD: completely randomized block design
b RSP Rind stripe pattern, RC Rind color, FFC Fruit flesh color, FW Fruit weight, FD Fruit diameter,
FL Fruit length, FSI Fruit shape index, SL Seed length, SW Seed width, 20-SWT 20-Seed weight

## Sheet: Table S2
Table S2. Main statistics of resequencing of two paretnal lines (K2 and L1) and GBS of 120 F2 plants
	K2	L1	120 F2 plants
# Clean reads (Q20)	76942482	68761544	561537056
Total based (bp)	10925832444	9764139248	79738261952
Total length in Mbp	10925.8	9764.14	79738.3
Coverage*	25.7078	22.9744	187.619
Mean depth of coverage	25.71	22.97	1.56
* Assume 425 Mbp genome size for watermelon (Guo et al. 2013)

## Sheet: Table S3
Tablde S3. Watermelon linkage map based on 1004 bins and 120 F2 plants from K2 × L1 cross
ID	Chr	cM	Start (97103 v1.0)	End (97103v1.0)	Bin size (Mb)
BIN0001	Chr1	0	4477818	5769891	1.29207
BIN0002	Chr1	0.417614	5769891	6586022	0.816131
BIN0003	Chr1	5.13003	6586022	6612040	0.026018
BIN0004	Chr1	5.96682	6612040	6614766	0.002726
BIN0005	Chr1	6.38432	6614766	6623595	0.008829
BIN0006	Chr1	6.80181	6623595	6737760	0.114165
BIN0007	Chr1	8.90678	6737760	6834108	0.096348
BIN0008	Chr1	9.32424	6834108	6868161	0.034053
BIN0009	Chr1	10.1609	6868161	6903298	0.035137
BIN0010	Chr1	10.5784	6903298	6935350	0.032052
BIN0011	Chr1	11.415	6935350	7041935	0.106585
BIN0012	Chr1	11.8325	7041935	7137259	0.095324
BIN0013	Chr1	12.669	7137259	7172020	0.034761
BIN0014	Chr1	13.9263	7172020	7394157	0.222137
BIN0015	Chr1	14.3438	7394157	7436595	0.042438
BIN0016	Chr1	14.7612	7436595	7859658	0.423063
BIN0017	Chr1	15.1787	7859658	8020125	0.160467
BIN0018	Chr1	15.5961	8020125	8081015	0.06089
BIN0019	Chr1	16.0136	8081015	8137743	0.056728
BIN0020	Chr1	17.2713	8137743	8315229	0.177486
BIN0021	Chr1	17.6888	8315229	8511376	0.196147
BIN0022	Chr1	23.2849	8511376	8553595	0.042219
BIN0023	Chr1	28.8935	8553595	8572587	0.018992
BIN0024	Chr1	30.1525	8572587	8971199	0.398612
BIN0025	Chr1	30.5701	8971199	9505575	0.534376
BIN0026	Chr1	32.2528	9505575	9508977	0.003402
BIN0027	Chr1	32.6703	9508977	9679521	0.170544
BIN0028	Chr1	33.0879	9679521	10152953	0.473432
BIN0029	Chr1	34.3463	10152953	10172401	0.019448
BIN0030	Chr1	34.7639	10172401	10185326	0.012925
BIN0031	Chr1	35.6009	10185326	10373777	0.188451
BIN0032	Chr1	36.0185	10373777	10415262	0.041485
BIN0033	Chr1	36.436	10415262	17497571	7.08231
BIN0034	Chr1	42.4676	17497571	17513234	0.015663
BIN0035	Chr1	46.2905	17513234	17519479	0.006245
BIN0036	Chr1	47.97	17519479	18258998	0.739519
BIN0037	Chr1	48.3874	18258998	18929547	0.670549
BIN0038	Chr1	49.6441	18929547	18993048	0.063501
BIN0039	Chr1	50.0615	18993048	19005260	0.012212
BIN0040	Chr1	51.3182	19005260	19146279	0.141019
BIN0041	Chr1	51.7357	19146279	21276214	2.12994
BIN0042	Chr1	61.4283	21276214	21341023	0.064809
BIN0043	Chr1	61.8458	21341023	21350409	0.009386
BIN0044	Chr1	62.2634	21350409	21798212	0.447803
BIN0045	Chr1	63.1001	21798212	22116072	0.31786
BIN0046	Chr1	67.8061	22116072	22161969	0.045897
BIN0047	Chr1	69.064	22161969	22739265	0.577296
BIN0048	Chr1	69.4815	22739265	23037538	0.298273
BIN0049	Chr1	70.3183	23037538	23197132	0.159594
BIN0050	Chr1	70.7358	23197132	23269892	0.07276
BIN0051	Chr1	71.1533	23269892	23298482	0.02859
BIN0052	Chr1	71.5708	23298482	23396499	0.098017
BIN0053	Chr1	71.9883	23396499	23685848	0.289349
BIN0054	Chr1	72.4059	23685848	23757929	0.072081
BIN0055	Chr1	72.8234	23757929	24234656	0.476727
BIN0056	Chr1	74.0813	24234656	24793697	0.559041
BIN0057	Chr1	74.918	24793697	26490603	1.69691
BIN0058	Chr1	105.218	26490603	26919202	0.428599
BIN0059	Chr1	107.754	26919202	26930657	0.011455
BIN0060	Chr1	108.591	26930657	27191826	0.261169
BIN0061	Chr1	112.424	27191826	27235903	0.044077
BIN0062	Chr1	113.26	27235903	27259524	0.023621
BIN0063	Chr1	113.678	27259524	27274069	0.014545
BIN0064	Chr1	114.936	27274069	27282404	0.008335
BIN0065	Chr1	115.773	27282404	27642572	0.360168
BIN0066	Chr1	116.609	27642572	27883016	0.240444
BIN0067	Chr1	117.446	27883016	27927974	0.044958
BIN0068	Chr1	117.864	27927974	28056892	0.128918
BIN0069	Chr1	118.7	28056892	28163576	0.106684
BIN0070	Chr1	119.118	28163576	28516973	0.353397
BIN0071	Chr1	119.535	28516973	28524672	0.007699
BIN0072	Chr1	121.215	28524672	28945904	0.421232
BIN0073	Chr1	121.633	28945904	28959671	0.013767
BIN0074	Chr1	122.89	28959671	29577894	0.618223
BIN0075	Chr1	123.727	29577894	29752397	0.174503
BIN0076	Chr1	124.144	29752397	29763819	0.011422
BIN0077	Chr1	125.402	29763819	29780271	0.016452
BIN0078	Chr1	125.82	29780271	29889477	0.109206
BIN0079	Chr1	127.078	29889477	29909564	0.020087
BIN0080	Chr1	127.495	29909564	30147249	0.237685
BIN0081	Chr1	131.325	30147249	30227450	0.080201
BIN0082	Chr1	131.743	30227450	30274179	0.046729
BIN0083	Chr1	132.16	30274179	31284970	1.01079
BIN0084	Chr1	135.125	31284970	31287048	0.002078
BIN0085	Chr1	137.233	31287048	31770488	0.48344
BIN0086	Chr1	138.071	31770488	34083085	2.3126
BIN0087	Chr2	0	295515	2240185	1.94467
BIN0088	Chr2	2.96753	2240185	2420291	0.180106
BIN0089	Chr2	3.80456	2420291	4224783	1.80449
BIN0090	Chr2	10.3048	4224783	4799364	0.574581
BIN0091	Chr2	12.411	4799364	4810430	0.011066
BIN0092	Chr2	13.2478	4810430	4816294	0.005864
BIN0093	Chr2	14.9294	4816294	4847007	0.030713
BIN0094	Chr2	15.347	4847007	5060355	0.213348
BIN0095	Chr2	16.1838	5060355	5111608	0.051253
BIN0096	Chr2	17.0207	5111608	5747406	0.635798
BIN0097	Chr2	18.2788	5747406	5764938	0.017532
BIN0098	Chr2	19.1156	5764938	6115838	0.3509
BIN0099	Chr2	20.796	6115838	6244034	0.128196
BIN0100	Chr2	21.6326	6244034	6282049	0.038015
BIN0101	Chr2	22.4693	6282049	6419975	0.137926
BIN0102	Chr2	22.8868	6419975	6607282	0.187307
BIN0103	Chr2	24.1448	6607282	6672546	0.065264
BIN0104	Chr2	24.5623	6672546	6801239	0.128693
BIN0105	Chr2	24.9798	6801239	7232244	0.431005
BIN0106	Chr2	25.3973	7232244	7329144	0.0969
BIN0107	Chr2	26.2342	7329144	7393284	0.06414
BIN0108	Chr2	26.6517	7393284	7397373	0.004089
BIN0109	Chr2	27.4886	7397373	9301260	1.90389
BIN0110	Chr2	29.1708	9301260	9310359	0.009099
BIN0111	Chr2	31.2801	9310359	10393183	1.08282
BIN0112	Chr2	39.7077	10393183	10452712	0.059529
BIN0113	Chr2	40.9682	10452712	10455942	0.00323
BIN0114	Chr2	41.386	10455942	12290156	1.83421
BIN0115	Chr2	56.2819	12290156	12378423	0.088267
BIN0116	Chr2	56.6996	12378423	12567021	0.188598
BIN0117	Chr2	57.1173	12567021	12586187	0.019166
BIN0118	Chr2	57.9548	12586187	13216615	0.630428
BIN0119	Chr2	88.0648	13216615	13273746	0.057131
BIN0120	Chr2	88.4824	13273746	13456478	0.182732
BIN0121	Chr2	89.3196	13456478	17252065	3.79559
BIN0122	Chr2	89.7372	17252065	17268676	0.016611
BIN0123	Chr2	90.1548	17268676	18284037	1.01536
BIN0124	Chr2	91.4133	18284037	18333656	0.049619
BIN0125	Chr2	92.2504	18333656	18500565	0.166909
BIN0126	Chr2	92.6679	18500565	19157848	0.657283
BIN0127	Chr2	93.0855	19157848	19172786	0.014938
BIN0128	Chr2	93.5031	19172786	19214075	0.041289
BIN0129	Chr2	93.9207	19214075	20036462	0.822387
BIN0130	Chr2	94.7577	20036462	20086968	0.050506
BIN0131	Chr2	95.1753	20086968	20332165	0.245197
BIN0132	Chr2	95.5929	20332165	20837883	0.505718
BIN0133	Chr2	97.2743	20837883	20945186	0.107303
BIN0134	Chr2	97.6918	20945186	21004810	0.059624
BIN0135	Chr2	98.1093	21004810	21012146	0.007336
BIN0136	Chr2	98.946	21012146	21029376	0.01723
BIN0137	Chr2	99.7826	21029376	24285493	3.25612
BIN0138	Chr2	116.941	24285493	24318525	0.033032
BIN0139	Chr2	118.198	24318525	24373069	0.054544
BIN0140	Chr2	120.727	24373069	24460536	0.087467
BIN0141	Chr2	121.145	24460536	24689854	0.229318
BIN0142	Chr2	121.562	24689854	24780296	0.090442
BIN0143	Chr2	121.979	24780296	24864293	0.083997
BIN0144	Chr2	122.397	24864293	24891894	0.027601
BIN0145	Chr2	122.814	24891894	24910801	0.018907
BIN0146	Chr2	123.231	24910801	24985876	0.075075
BIN0147	Chr2	123.649	24985876	25699945	0.714069
BIN0148	Chr2	127.464	25699945	25701005	0.00106
BIN0149	Chr2	128.3	25701005	25712491	0.011486
BIN0150	Chr2	128.717	25712491	25778804	0.066313
BIN0151	Chr2	130.397	25778804	26010405	0.231601
BIN0152	Chr2	131.234	26010405	26016260	0.005855
BIN0153	Chr2	132.071	26016260	26119024	0.102764
BIN0154	Chr2	132.908	26119024	26163321	0.044297
BIN0155	Chr2	133.325	26163321	26289965	0.126644
BIN0156	Chr2	134.162	26289965	26340936	0.050971
BIN0157	Chr2	134.579	26340936	26352403	0.011467
BIN0158	Chr2	134.997	26352403	26374283	0.02188
BIN0159	Chr2	135.415	26374283	26494275	0.119992
BIN0160	Chr2	135.832	26494275	26506891	0.012616
BIN0161	Chr2	136.669	26506891	26767534	0.260643
BIN0162	Chr2	137.086	26767534	26771965	0.004431
BIN0163	Chr2	137.923	26771965	26915570	0.143605
BIN0164	Chr2	139.181	26915570	27059635	0.144065
BIN0165	Chr2	140.439	27059635	27101122	0.041487
BIN0166	Chr2	140.856	27101122	27121191	0.020069
BIN0167	Chr2	141.693	27121191	27122442	0.001251
BIN0168	Chr2	142.53	27122442	27159459	0.037017
BIN0169	Chr2	142.947	27159459	27174310	0.014851
BIN0170	Chr2	143.365	27174310	27596617	0.422307
BIN0171	Chr2	145.897	27596617	27603568	0.006951
BIN0172	Chr2	146.733	27603568	27716075	0.112507
BIN0173	Chr2	147.57	27716075	27750330	0.034255
BIN0174	Chr2	147.988	27750330	27764109	0.013779
BIN0175	Chr2	148.824	27764109	27795180	0.031071
BIN0176	Chr2	149.242	27795180	27817602	0.022422
BIN0177	Chr2	149.659	27817602	27832994	0.015392
BIN0178	Chr2	150.077	27832994	27852099	0.019105
BIN0179	Chr2	150.494	27852099	27932391	0.080292
BIN0180	Chr2	151.331	27932391	28021219	0.088828
BIN0181	Chr2	152.168	28021219	28579892	0.558673
BIN0182	Chr2	155.131	28579892	28762696	0.182804
BIN0183	Chr2	155.548	28762696	28766510	0.003814
BIN0184	Chr2	155.966	28766510	28814059	0.047549
BIN0185	Chr2	156.802	28814059	29057681	0.243622
BIN0186	Chr2	158.482	29057681	29068313	0.010632
BIN0187	Chr2	159.739	29068313	29076406	0.008093
BIN0188	Chr2	160.576	29076406	29147760	0.071354
BIN0189	Chr2	161.412	29147760	29173479	0.025719
BIN0190	Chr2	161.83	29173479	29385011	0.211532
BIN0191	Chr2	162.247	29385011	29433763	0.048752
BIN0192	Chr2	163.084	29433763	29656654	0.222891
BIN0193	Chr2	164.342	29656654	29747413	0.090759
BIN0194	Chr2	164.759	29747413	29840222	0.092809
BIN0195	Chr2	165.177	29840222	30285916	0.445694
BIN0196	Chr2	167.709	30285916	30303878	0.017962
BIN0197	Chr2	168.967	30303878	30326380	0.022502
BIN0198	Chr2	169.385	30326380	30368507	0.042127
BIN0199	Chr2	169.802	30368507	30413540	0.045033
BIN0200	Chr2	170.22	30413540	30462348	0.048808
BIN0201	Chr2	171.056	30462348	30579001	0.116653
BIN0202	Chr2	172.314	30579001	30727332	0.148331
BIN0203	Chr2	173.151	30727332	31031201	0.303869
BIN0204	Chr2	173.988	31031201	31054957	0.023756
BIN0205	Chr2	175.246	31054957	31138925	0.083968
BIN0206	Chr2	175.664	31138925	31144816	0.005891
BIN0207	Chr2	176.081	31144816	31326058	0.181242
BIN0208	Chr2	177.34	31326058	31600406	0.274348
BIN0209	Chr2	178.598	31600406	32043420	0.443014
BIN0210	Chr2	180.279	32043420	32088406	0.044986
BIN0211	Chr2	180.697	32088406	32102902	0.014496
BIN0212	Chr2	181.534	32102902	32133481	0.030579
BIN0213	Chr2	181.951	32133481	32219516	0.086035
BIN0214	Chr2	182.369	32219516	32257235	0.037719
BIN0215	Chr2	182.786	32257235	32322704	0.065469
BIN0216	Chr2	183.204	32322704	32329154	0.00645
BIN0217	Chr2	183.621	32329154	32406850	0.077696
BIN0218	Chr2	184.039	32406850	32490438	0.083588
BIN0219	Chr2	184.456	32490438	32983087	0.492649
BIN0220	Chr2	186.562	32983087	33032171	0.049084
BIN0221	Chr2	186.98	33032171	33064931	0.03276
BIN0222	Chr2	187.397	33064931	33079265	0.014334
BIN0223	Chr2	187.815	33079265	33245018	0.165753
BIN0224	Chr2	189.919	33245018	33399041	0.154023
BIN0225	Chr2	191.599	33399041	33401355	0.002314
BIN0226	Chr2	192.017	33401355	33464327	0.062972
BIN0227	Chr2	192.434	33464327	33476973	0.012646
BIN0228	Chr2	192.852	33476973	33745315	0.268342
BIN0229	Chr2	195.811	33745315	33848522	0.103207
BIN0230	Chr2	196.228	33848522	33867611	0.019089
BIN0231	Chr2	196.645	33867611	33885145	0.017534
BIN0232	Chr2	197.063	33885145	34414252	0.529107
BIN0233	Chr3	0	27012	339092	0.31208
BIN0234	Chr3	0.417438	339092	390925	0.051833
BIN0235	Chr3	0.834876	390925	439929	0.049004
BIN0236	Chr3	1.25231	439929	624225	0.184296
BIN0237	Chr3	1.66975	624225	668820	0.044595
BIN0238	Chr3	2.9269	668820	772650	0.10383
BIN0239	Chr3	3.76334	772650	845372	0.072722
BIN0240	Chr3	4.18077	845372	1240239	0.394867
BIN0241	Chr3	4.59823	1240239	1299631	0.059392
BIN0242	Chr3	5.01568	1299631	1302155	0.002524
BIN0243	Chr3	5.43312	1302155	1383437	0.081282
BIN0244	Chr3	6.26961	1383437	1401932	0.018495
BIN0245	Chr3	6.68705	1401932	1453577	0.051645
BIN0246	Chr3	7.10449	1453577	1496487	0.04291
BIN0247	Chr3	8.36136	1496487	1581221	0.084734
BIN0248	Chr3	9.19768	1581221	1741463	0.160242
BIN0249	Chr3	9.6151	1741463	1922869	0.181406
BIN0250	Chr3	10.0325	1922869	1926049	0.00318
BIN0251	Chr3	10.8691	1926049	1962288	0.036239
BIN0252	Chr3	12.5493	1962288	1972680	0.010392
BIN0253	Chr3	13.3857	1972680	1975996	0.003316
BIN0254	Chr3	13.8031	1975996	2038403	0.062407
BIN0255	Chr3	14.6394	2038403	2275166	0.236763
BIN0256	Chr3	15.0567	2275166	2317642	0.042476
BIN0257	Chr3	17.1582	2317642	6953845	4.6362
BIN0258	Chr3	33.2276	6953845	6974956	0.021111
BIN0259	Chr3	36.6151	6974956	7003937	0.028981
BIN0260	Chr3	37.4518	7003937	7413966	0.410029
BIN0261	Chr3	38.7092	7413966	7426623	0.012657
BIN0262	Chr3	39.1267	7426623	7898394	0.471771
BIN0263	Chr3	40.3842	7898394	7928415	0.030021
BIN0264	Chr3	40.8017	7928415	8161582	0.233167
BIN0265	Chr3	42.0591	8161582	8188615	0.027033
BIN0266	Chr3	42.4766	8188615	8204317	0.015702
BIN0267	Chr3	42.894	8204317	8265497	0.06118
BIN0268	Chr3	43.3115	8265497	9284004	1.01851
BIN0269	Chr3	44.9917	9284004	9623684	0.33968
BIN0270	Chr3	46.2493	9623684	9674231	0.050547
BIN0271	Chr3	46.6668	9674231	9932557	0.258326
BIN0272	Chr3	47.5034	9932557	9995327	0.06277
BIN0273	Chr3	47.9208	9995327	10169371	0.174044
BIN0274	Chr3	49.1785	10169371	10222650	0.053279
BIN0275	Chr3	49.5961	10222650	10584501	0.361851
BIN0276	Chr3	50.4328	10584501	10623778	0.039277
BIN0277	Chr3	50.8504	10623778	10730092	0.106314
BIN0278	Chr3	52.9557	10730092	10734448	0.004356
BIN0279	Chr3	53.3732	10734448	10753528	0.01908
BIN0280	Chr3	53.3732	10753528	11564106	0.810578
BIN0281	Chr3	53.3732	11564106	12133076	0.56897
BIN0282	Chr3	53.7907	12133076	12174734	0.041658
BIN0283	Chr3	57.6163	12174734	14105818	1.93108
BIN0284	Chr3	58.0338	14105818	14264987	0.159169
BIN0285	Chr3	58.4513	14264987	14672795	0.407808
BIN0286	Chr3	60.131	14672795	18846180	4.17338
BIN0287	Chr3	66.5928	18846180	19569557	0.723377
BIN0288	Chr3	69.1212	19569557	19748080	0.178523
BIN0289	Chr3	69.5386	19748080	20016800	0.26872
BIN0290	Chr3	70.7956	20016800	20019941	0.003141
BIN0291	Chr3	72.4746	20019941	20028250	0.008309
BIN0292	Chr3	76.2934	20028250	20031553	0.003303
BIN0293	Chr3	76.7109	20031553	20033801	0.002248
BIN0294	Chr3	77.1284	20033801	20191361	0.15756
BIN0295	Chr3	77.9651	20191361	20195853	0.004492
BIN0296	Chr3	78.3826	20195853	20218274	0.022421
BIN0297	Chr3	78.8001	20218274	22484883	2.26661
BIN0298	Chr3	79.6367	22484883	22557035	0.072152
BIN0299	Chr3	80.0542	22557035	22753889	0.196854
BIN0300	Chr3	80.4717	22753889	22761053	0.007164
BIN0301	Chr3	80.8892	22761053	22835613	0.07456
BIN0302	Chr3	82.1472	22835613	22891395	0.055782
BIN0303	Chr3	83.4051	22891395	23605050	0.713655
BIN0304	Chr3	85.9369	23605050	23612827	0.007777
BIN0305	Chr3	88.0415	23612827	23709413	0.096586
BIN0306	Chr3	88.459	23709413	23947499	0.238086
BIN0307	Chr3	89.7164	23947499	24684213	0.736714
BIN0308	Chr3	91.8218	24684213	24794246	0.110033
BIN0309	Chr3	93.9259	24794246	25433804	0.639558
BIN0310	Chr3	99.0522	25433804	25509411	0.075607
BIN0311	Chr3	99.8884	25509411	26846636	1.33723
BIN0312	Chr3	109.116	26846636	26852464	0.005828
BIN0313	Chr3	109.953	26852464	26863686	0.011222
BIN0314	Chr3	110.37	26863686	26867140	0.003454
BIN0315	Chr3	110.788	26867140	26881783	0.014643
BIN0316	Chr3	111.625	26881783	27114258	0.232475
BIN0317	Chr3	112.042	27114258	27204908	0.09065
BIN0318	Chr3	113.724	27204908	27233619	0.028711
BIN0319	Chr3	114.141	27233619	27296339	0.06272
BIN0320	Chr3	114.559	27296339	27723769	0.42743
BIN0321	Chr3	117.521	27723769	27857079	0.13331
BIN0322	Chr3	118.358	27857079	27932981	0.075902
BIN0323	Chr3	118.776	27932981	28026513	0.093532
BIN0324	Chr3	120.033	28026513	28175799	0.149286
BIN0325	Chr3	120.87	28175799	28194535	0.018736
BIN0326	Chr3	121.287	28194535	28939167	0.744632
BIN0327	Chr4	0	159472	912477	0.753005
BIN0328	Chr4	0.417629	912477	1006696	0.094219
BIN0329	Chr4	1.2549	1006696	3447651	2.44096
BIN0330	Chr4	2.93781	3447651	3569315	0.121664
BIN0331	Chr4	5.47491	3569315	3815261	0.245946
BIN0332	Chr4	10.1938	3815261	3875101	0.05984
BIN0333	Chr4	11.453	3875101	4635510	0.760409
BIN0334	Chr4	11.8707	4635510	5080277	0.444767
BIN0335	Chr4	13.5543	5080277	5151426	0.071149
BIN0336	Chr4	13.972	5151426	5627574	0.476148
BIN0337	Chr4	14.8093	5627574	5679073	0.051499
BIN0338	Chr4	15.227	5679073	5713485	0.034412
BIN0339	Chr4	15.6446	5713485	6153678	0.440193
BIN0340	Chr4	17.328	6153678	6224117	0.070439
BIN0341	Chr4	17.7457	6224117	6489149	0.265032
BIN0342	Chr4	18.5832	6489149	7253185	0.764036
BIN0343	Chr4	19.4206	7253185	7288509	0.035324
BIN0344	Chr4	20.2579	7288509	7340699	0.05219
BIN0345	Chr4	21.0953	7340699	7443408	0.102709
BIN0346	Chr4	21.5129	7443408	7487067	0.043659
BIN0347	Chr4	22.3502	7487067	8092429	0.605362
BIN0348	Chr4	22.7678	8092429	8148805	0.056376
BIN0349	Chr4	23.1855	8148805	8391242	0.242437
BIN0350	Chr4	28.7972	8391242	8396960	0.005718
BIN0351	Chr4	29.2149	8396960	8405617	0.008657
BIN0352	Chr4	31.3242	8405617	8441674	0.036057
BIN0353	Chr4	31.7418	8441674	9042358	0.600684
BIN0354	Chr4	32.1595	9042358	9067468	0.02511
BIN0355	Chr4	32.5771	9067468	9263505	0.196037
BIN0356	Chr4	33.4145	9263505	9301865	0.03836
BIN0357	Chr4	33.8321	9301865	9365937	0.064072
BIN0358	Chr4	34.2498	9365937	9722224	0.356287
BIN0359	Chr4	34.6675	9722224	9824658	0.102434
BIN0360	Chr4	35.0852	9824658	9838880	0.014222
BIN0361	Chr4	35.9225	9838880	9884191	0.045311
BIN0362	Chr4	36.3402	9884191	10061867	0.177676
BIN0363	Chr4	36.7579	10061867	10070717	0.00885
BIN0364	Chr4	37.1755	10070717	10176469	0.105752
BIN0365	Chr4	38.0129	10176469	10628008	0.451539
BIN0366	Chr4	38.4305	10628008	10895492	0.267484
BIN0367	Chr4	38.8481	10895492	11799349	0.903857
BIN0368	Chr4	40.1072	11799349	11817829	0.01848
BIN0369	Chr4	40.5249	11817829	12137379	0.31955
BIN0370	Chr4	40.5249	12137379	13826636	1.68926
BIN0371	Chr4	40.5249	13826636	14187196	0.36056
BIN0372	Chr4	41.7841	14187196	14541744	0.354548
BIN0373	Chr4	51.1383	14541744	14554676	0.012932
BIN0374	Chr4	52.3972	14554676	14563037	0.008361
BIN0375	Chr4	52.8148	14563037	14716094	0.153057
BIN0376	Chr4	53.2324	14716094	15147015	0.430921
BIN0377	Chr4	53.65	15147015	15163850	0.016835
BIN0378	Chr4	54.0676	15163850	15235989	0.072139
BIN0379	Chr4	54.9048	15235989	15289487	0.053498
BIN0380	Chr4	55.3225	15289487	15303357	0.01387
BIN0381	Chr4	55.7401	15303357	15331556	0.028199
BIN0382	Chr4	56.1577	15331556	15440188	0.108632
BIN0383	Chr4	56.5753	15440188	15447432	0.007244
BIN0384	Chr4	56.993	15447432	15453513	0.006081
BIN0385	Chr4	57.8304	15453513	15492658	0.039145
BIN0386	Chr4	58.248	15492658	15645314	0.152656
BIN0387	Chr4	58.6657	15645314	15673772	0.028458
BIN0388	Chr4	59.0833	15673772	15712339	0.038567
BIN0389	Chr4	59.9204	15712339	16716508	1.00417
BIN0390	Chr4	67.8338	16716508	16739616	0.023108
BIN0391	Chr4	68.6709	16739616	16795600	0.055984
BIN0392	Chr4	69.0885	16795600	16799802	0.004202
BIN0393	Chr4	70.3469	16799802	17330750	0.530948
BIN0394	Chr4	70.7644	17330750	17404234	0.073484
BIN0395	Chr4	72.8709	17404234	17428085	0.023851
BIN0396	Chr4	73.2885	17428085	17819497	0.391412
BIN0397	Chr4	73.706	17819497	18199502	0.380005
BIN0398	Chr4	75.3877	18199502	18272301	0.072799
BIN0399	Chr4	77.0696	18272301	18470046	0.197745
BIN0400	Chr4	77.4872	18470046	18702846	0.2328
BIN0401	Chr4	79.1691	18702846	18761803	0.058957
BIN0402	Chr4	79.5867	18761803	18766924	0.005121
BIN0403	Chr4	80.0043	18766924	18860432	0.093508
BIN0404	Chr4	81.263	18860432	18868650	0.008218
BIN0405	Chr4	81.6805	18868650	18870688	0.002038
BIN0406	Chr4	82.5176	18870688	18889636	0.018948
BIN0407	Chr4	82.9351	18889636	18925862	0.036226
BIN0408	Chr4	83.3527	18925862	19167808	0.241946
BIN0409	Chr4	83.7702	19167808	19228281	0.060473
BIN0410	Chr4	85.0282	19228281	19251251	0.02297
BIN0411	Chr4	85.4457	19251251	19255754	0.004503
BIN0412	Chr4	86.2823	19255754	19407043	0.151289
BIN0413	Chr4	86.6998	19407043	24315960	4.90892
BIN0414	Chr5	0	340348	1591832	1.25148
BIN0415	Chr5	0.836913	1591832	8002779	6.41095
BIN0416	Chr5	6.90182	8002779	8413696	0.410917
BIN0417	Chr5	7.73873	8413696	8415125	0.001429
BIN0418	Chr5	11.1379	8415125	8649503	0.234378
BIN0419	Chr5	11.5554	8649503	8702354	0.052851
BIN0420	Chr5	11.9729	8702354	8908630	0.206276
BIN0421	Chr5	12.3904	8908630	8969259	0.060629
BIN0422	Chr5	12.8079	8969259	9072688	0.103429
BIN0423	Chr5	13.2254	9072688	9860881	0.788193
BIN0424	Chr5	14.9056	9860881	9883715	0.022834
BIN0425	Chr5	16.586	9883715	10159573	0.275858
BIN0426	Chr5	17.0035	10159573	10225607	0.066034
BIN0427	Chr5	17.421	10225607	10261193	0.035586
BIN0428	Chr5	17.8385	10261193	10531584	0.270391
BIN0429	Chr5	19.096	10531584	10558558	0.026974
BIN0430	Chr5	19.9327	10558558	10563567	0.005009
BIN0431	Chr5	20.3502	10563567	10626212	0.062645
BIN0432	Chr5	20.7677	10626212	10772135	0.145923
BIN0433	Chr5	22.0253	10772135	10781762	0.009627
BIN0434	Chr5	22.4427	10781762	11339348	0.557586
BIN0435	Chr5	23.7001	11339348	11365397	0.026049
BIN0436	Chr5	24.9578	11365397	11379686	0.014289
BIN0437	Chr5	25.3754	11379686	11421779	0.042093
BIN0438	Chr5	26.2122	11421779	11936608	0.514829
BIN0439	Chr5	26.6297	11936608	12207294	0.270686
BIN0440	Chr5	27.0473	12207294	12227109	0.019815
BIN0441	Chr5	27.4648	12227109	12431671	0.204562
BIN0442	Chr5	27.8823	12431671	12448734	0.017063
BIN0443	Chr5	28.2998	12448734	12452304	0.00357
BIN0444	Chr5	28.7173	12452304	12492765	0.040461
BIN0445	Chr5	29.1348	12492765	12834859	0.342094
BIN0446	Chr5	29.9716	12834859	13196856	0.361997
BIN0447	Chr5	31.2296	13196856	13250572	0.053716
BIN0448	Chr5	32.4878	13250572	13393066	0.142494
BIN0449	Chr5	33.3249	13393066	13573159	0.180093
BIN0450	Chr5	33.7425	13573159	15318932	1.74577
BIN0451	Chr5	34.1601	15318932	15477559	0.158627
BIN0452	Chr5	34.5777	15477559	15708747	0.231188
BIN0453	Chr5	34.9953	15708747	15892741	0.183994
BIN0454	Chr5	36.2538	15892741	15900364	0.007623
BIN0455	Chr5	36.6714	15900364	16296812	0.396448
BIN0456	Chr5	37.0889	16296812	18943209	2.6464
BIN0457	Chr5	41.3546	18943209	21034631	2.09142
BIN0458	Chr5	43.4596	21034631	21563425	0.528794
BIN0459	Chr5	45.14	21563425	21569086	0.005661
BIN0460	Chr5	48.1027	21569086	21599399	0.030313
BIN0461	Chr5	48.5202	21599399	21603509	0.00411
BIN0462	Chr5	48.9378	21603509	21608792	0.005283
BIN0463	Chr5	49.7747	21608792	21699559	0.090767
BIN0464	Chr5	50.1922	21699559	21955330	0.255771
BIN0465	Chr5	50.6098	21955330	22294881	0.339551
BIN0466	Chr5	51.0273	22294881	22903791	0.60891
BIN0467	Chr5	53.5621	22903791	22981407	0.077616
BIN0468	Chr5	54.3992	22981407	23066662	0.085255
BIN0469	Chr5	56.0811	23066662	23224733	0.158071
BIN0470	Chr5	56.4986	23224733	24416531	1.1918
BIN0471	Chr5	59.4646	24416531	24421226	0.004695
BIN0472	Chr5	60.3018	24421226	24430150	0.008924
BIN0473	Chr5	62.8395	24430150	24449780	0.01963
BIN0474	Chr5	63.6766	24449780	24581581	0.131801
BIN0475	Chr5	64.0942	24581581	24592794	0.011213
BIN0476	Chr5	64.5119	24592794	24659033	0.066239
BIN0477	Chr5	65.3492	24659033	24987468	0.328435
BIN0478	Chr5	65.7669	24987468	25053200	0.065732
BIN0479	Chr5	66.1845	25053200	25212516	0.159316
BIN0480	Chr5	66.6022	25212516	25347586	0.13507
BIN0481	Chr5	67.0198	25347586	25526933	0.179347
BIN0482	Chr5	67.857	25526933	25539634	0.012701
BIN0483	Chr5	68.6943	25539634	25708079	0.168445
BIN0484	Chr5	69.5314	25708079	27243024	1.53495
BIN0485	Chr5	70.7899	27243024	27246150	0.003126
BIN0486	Chr5	75.0608	27246150	27247517	0.001367
BIN0487	Chr5	75.4784	27247517	27305520	0.058003
BIN0488	Chr5	75.8959	27305520	27654590	0.34907
BIN0489	Chr5	76.7328	27654590	27755708	0.101118
BIN0490	Chr5	77.5698	27755708	27946381	0.190673
BIN0491	Chr5	78.8283	27946381	28033006	0.086625
BIN0492	Chr5	79.2458	28033006	28135208	0.102202
BIN0493	Chr5	79.6634	28135208	28142678	0.00747
BIN0494	Chr5	80.081	28142678	28168311	0.025633
BIN0495	Chr5	80.4985	28168311	28531081	0.36277
BIN0496	Chr5	82.1802	28531081	28565787	0.034706
BIN0497	Chr5	82.5977	28565787	28677133	0.111346
BIN0498	Chr5	85.1325	28677133	28805544	0.128411
BIN0499	Chr5	85.5501	28805544	29021788	0.216244
BIN0500	Chr5	85.9677	29021788	29074984	0.053196
BIN0501	Chr5	86.3852	29074984	29104637	0.029653
BIN0502	Chr5	87.2222	29104637	29162418	0.057781
BIN0503	Chr5	87.6398	29162418	29230357	0.067939
BIN0504	Chr5	88.0573	29230357	29242509	0.012152
BIN0505	Chr5	89.739	29242509	29727937	0.485428
BIN0506	Chr5	90.5759	29727937	29782435	0.054498
BIN0507	Chr5	91.413	29782435	29976493	0.194058
BIN0508	Chr5	94.383	29976493	29983158	0.006665
BIN0509	Chr5	95.6423	29983158	30182136	0.198978
BIN0510	Chr5	96.4797	30182136	30260347	0.078211
BIN0511	Chr5	96.8973	30260347	30273786	0.013439
BIN0512	Chr5	97.7346	30273786	30683580	0.409794
BIN0513	Chr5	98.1522	30683580	31004947	0.321367
BIN0514	Chr5	98.9895	31004947	33714806	2.70986
BIN0515	Chr6	0	20965	1833017	1.81205
BIN0516	Chr6	0.417511	1833017	2053811	0.220794
BIN0517	Chr6	1.67534	2053811	2650769	0.596958
BIN0518	Chr6	4.20897	2650769	3177478	0.526709
BIN0519	Chr6	5.04594	3177478	4314137	1.13666
BIN0520	Chr6	11.5462	4314137	4902090	0.587953
BIN0521	Chr6	12.804	4902090	4941943	0.039853
BIN0522	Chr6	15.3371	4941943	4953180	0.011237
BIN0523	Chr6	16.1738	4953180	5056881	0.103701
BIN0524	Chr6	16.5913	5056881	5638495	0.581614
BIN0525	Chr6	19.5516	5638495	5769159	0.130664
BIN0526	Chr6	19.9691	5769159	5802534	0.033375
BIN0527	Chr6	20.3865	5802534	6316255	0.513721
BIN0528	Chr6	22.4911	6316255	6338042	0.021787
BIN0529	Chr6	23.7486	6338042	6355969	0.017927
BIN0530	Chr6	24.5853	6355969	6390245	0.034276
BIN0531	Chr6	25.0028	6390245	6903704	0.513459
BIN0532	Chr6	26.2601	6903704	6924639	0.020935
BIN0533	Chr6	27.0966	6924639	6984072	0.059433
BIN0534	Chr6	28.3535	6984072	6996981	0.012909
BIN0535	Chr6	28.7708	6996981	7040045	0.043064
BIN0536	Chr6	29.1882	7040045	7075480	0.035435
BIN0537	Chr6	29.6056	7075480	7140686	0.065206
BIN0538	Chr6	30.023	7140686	7251373	0.110687
BIN0539	Chr6	30.4404	7251373	7307955	0.056582
BIN0540	Chr6	30.8578	7307955	7437602	0.129647
BIN0541	Chr6	31.694	7437602	7469067	0.031465
BIN0542	Chr6	32.9506	7469067	7687432	0.218365
BIN0543	Chr6	34.2074	7687432	8197320	0.509888
BIN0544	Chr6	35.8866	8197320	8199002	0.001682
BIN0545	Chr6	36.7228	8199002	8221819	0.022817
BIN0546	Chr6	37.1401	8221819	8224244	0.002425
BIN0547	Chr6	37.5575	8224244	8754980	0.530736
BIN0548	Chr6	39.2357	8754980	8761970	0.00699
BIN0549	Chr6	40.0719	8761970	8773866	0.011896
BIN0550	Chr6	40.4893	8773866	9101307	0.327441
BIN0551	Chr6	41.3254	9101307	9225976	0.124669
BIN0552	Chr6	43.8527	9225976	9254247	0.028271
BIN0553	Chr6	44.2701	9254247	9347310	0.093063
BIN0554	Chr6	44.6875	9347310	9554586	0.207276
BIN0555	Chr6	45.1049	9554586	9653435	0.098849
BIN0556	Chr6	45.9413	9653435	9730871	0.077436
BIN0557	Chr6	46.3587	9730871	9777828	0.046957
BIN0558	Chr6	47.1952	9777828	9820130	0.042302
BIN0559	Chr6	47.6127	9820130	10160535	0.340405
BIN0560	Chr6	48.0301	10160535	10234295	0.07376
BIN0561	Chr6	48.4476	10234295	10247553	0.013258
BIN0562	Chr6	49.2841	10247553	11129922	0.882369
BIN0563	Chr6	51.3879	11129922	11511945	0.382023
BIN0564	Chr6	51.8053	11511945	14888954	3.37701
BIN0565	Chr6	55.197	14888954	14896689	0.007735
BIN0566	Chr6	57.7324	14896689	15036847	0.140158
BIN0567	Chr6	58.15	15036847	15831060	0.794213
BIN0568	Chr6	58.9872	15831060	20102766	4.27171
BIN0569	Chr6	60.246	20102766	20109959	0.007193
BIN0570	Chr6	61.5048	20109959	20999671	0.889712
BIN0571	Chr6	64.9072	20999671	21021234	0.021563
BIN0572	Chr6	65.3248	21021234	21027136	0.005902
BIN0573	Chr6	65.7423	21027136	21034681	0.007545
BIN0574	Chr6	67.4245	21034681	21155410	0.120729
BIN0575	Chr6	69.1069	21155410	21191881	0.036471
BIN0576	Chr6	69.5245	21191881	21208992	0.017111
BIN0577	Chr6	70.3617	21208992	21566523	0.357531
BIN0578	Chr6	70.7793	21566523	22535585	0.969062
BIN0579	Chr6	73.3164	22535585	22767045	0.23146
BIN0580	Chr6	73.734	22767045	22779856	0.012811
BIN0581	Chr6	74.1516	22779856	22842693	0.062837
BIN0582	Chr6	74.5693	22842693	22869109	0.026416
BIN0583	Chr6	74.9869	22869109	25357936	2.48883
BIN0584	Chr6	84.8215	25357936	25393757	0.035821
BIN0585	Chr6	89.5404	25393757	25465282	0.071525
BIN0586	Chr6	89.958	25465282	25556832	0.09155
BIN0587	Chr6	90.3756	25556832	25570000	0.013168
BIN0588	Chr6	91.634	25570000	25574995	0.004995
BIN0589	Chr6	92.0515	25574995	25770146	0.195151
BIN0590	Chr6	92.4691	25770146	25812217	0.042071
BIN0591	Chr6	95.0027	25812217	25834774	0.022557
BIN0592	Chr6	95.4202	25834774	25853417	0.018643
BIN0593	Chr6	95.8378	25853417	26656842	0.803425
BIN0594	Chr6	96.2553	26656842	27018480	0.361638
BIN0595	Chr7	0	128975	1365670	1.2367
BIN0596	Chr7	0.836554	1365670	1477084	0.111414
BIN0597	Chr7	1.25402	1477084	2848917	1.37183
BIN0598	Chr7	1.67149	2848917	3137711	0.288794
BIN0599	Chr7	10.9276	3137711	3580499	0.442788
BIN0600	Chr7	11.3452	3580499	3921553	0.341054
BIN0601	Chr7	11.7627	3921553	4031072	0.109519
BIN0602	Chr7	16.4708	4031072	4159576	0.128504
BIN0603	Chr7	16.8884	4159576	4182397	0.022821
BIN0604	Chr7	17.3059	4182397	4289505	0.107108
BIN0605	Chr7	17.7235	4289505	4576523	0.287018
BIN0606	Chr7	19.4051	4576523	4583926	0.007403
BIN0607	Chr7	20.6637	4583926	5052718	0.468792
BIN0608	Chr7	21.5007	5052718	5078602	0.025884
BIN0609	Chr7	22.7593	5078602	5272789	0.194187
BIN0610	Chr7	23.177	5272789	5373271	0.100482
BIN0611	Chr7	24.4358	5373271	5490781	0.11751
BIN0612	Chr7	24.8534	5490781	5541834	0.051053
BIN0613	Chr7	25.271	5541834	5963029	0.421195
BIN0614	Chr7	26.9531	5963029	6538462	0.575433
BIN0615	Chr7	29.0609	6538462	6561123	0.022661
BIN0616	Chr7	29.8979	6561123	6645561	0.084438
BIN0617	Chr7	30.3155	6645561	6816431	0.17087
BIN0618	Chr7	31.1526	6816431	6899263	0.082832
BIN0619	Chr7	31.5702	6899263	6938306	0.039043
BIN0620	Chr7	31.9878	6938306	7300988	0.362682
BIN0621	Chr7	32.825	7300988	7676919	0.375931
BIN0622	Chr7	33.6621	7676919	8454171	0.777252
BIN0623	Chr7	34.0797	8454171	11529474	3.0753
BIN0624	Chr7	37.0464	11529474	11560537	0.031063
BIN0625	Chr7	37.464	11560537	11697071	0.136534
BIN0626	Chr7	37.8817	11697071	12836681	1.13961
BIN0627	Chr7	39.5641	12836681	13334681	0.498
BIN0628	Chr7	39.9817	13334681	13527860	0.193179
BIN0629	Chr7	40.3993	13527860	13620344	0.092484
BIN0630	Chr7	40.8169	13620344	15397835	1.77749
BIN0631	Chr7	42.925	15397835	15837982	0.440147
BIN0632	Chr7	44.6071	15837982	16231600	0.393618
BIN0633	Chr7	45.4441	16231600	16510057	0.278457
BIN0634	Chr7	45.8617	16510057	16642567	0.13251
BIN0635	Chr7	46.2792	16642567	17211718	0.569151
BIN0636	Chr7	47.1162	17211718	17941255	0.729537
BIN0637	Chr7	47.9533	17941255	18064578	0.123323
BIN0638	Chr7	49.6352	18064578	18117325	0.052747
BIN0639	Chr7	51.7429	18117325	18118325	0.001
BIN0640	Chr7	52.1605	18118325	18119537	0.001212
BIN0641	Chr7	52.9974	18119537	18121209	0.001672
BIN0642	Chr7	55.1027	18121209	24631904	6.5107
BIN0643	Chr7	69.8181	24631904	25006626	0.374722
BIN0644	Chr7	71.9227	25006626	25210447	0.203821
BIN0645	Chr7	72.3401	25210447	25300594	0.090147
BIN0646	Chr7	72.7576	25300594	25370779	0.070185
BIN0647	Chr7	73.175	25370779	25400541	0.029762
BIN0648	Chr7	74.0115	25400541	25781882	0.381341
BIN0649	Chr7	74.4289	25781882	25844161	0.062279
BIN0650	Chr7	76.1086	25844161	28835768	2.99161
BIN0651	Chr7	84.4133	28835768	28865079	0.029311
BIN0652	Chr7	87.3712	28865079	29123240	0.258161
BIN0653	Chr7	87.7886	29123240	29257523	0.134283
BIN0654	Chr7	88.206	29257523	29530468	0.272945
BIN0655	Chr7	90.309	29530468	29720230	0.189762
BIN0656	Chr7	90.7264	29720230	29723716	0.003486
BIN0657	Chr7	91.1438	29723716	29809806	0.08609
BIN0658	Chr7	91.98	29809806	30278060	0.468254
BIN0659	Chr7	93.2366	30278060	30605331	0.327271
BIN0660	Chr7	93.654	30605331	30615254	0.009923
BIN0661	Chr7	94.0714	30615254	30638223	0.022969
BIN0662	Chr7	94.4888	30638223	30654710	0.016487
BIN0663	Chr7	94.9062	30654710	31477646	0.822936
BIN0664	Chr8	0	28215	1558762	1.53055
BIN0665	Chr8	0.837032	1558762	2520589	0.961827
BIN0666	Chr8	1.25459	2520589	2799646	0.279057
BIN0667	Chr8	2.5127	2799646	2873267	0.073621
BIN0668	Chr8	3.77067	2873267	2957081	0.083814
BIN0669	Chr8	4.18818	2957081	3078334	0.121253
BIN0670	Chr8	4.60569	3078334	3617750	0.539416
BIN0671	Chr8	5.0232	3617750	3647523	0.029773
BIN0672	Chr8	6.70413	3647523	5207778	1.56025
BIN0673	Chr8	21.4195	5207778	5251186	0.043408
BIN0674	Chr8	21.837	5251186	5522419	0.271233
BIN0675	Chr8	22.6737	5522419	6540934	1.01852
BIN0676	Chr8	23.0912	6540934	6930633	0.389699
BIN0677	Chr8	25.6226	6930633	9441624	2.51099
BIN0678	Chr8	29.0153	9441624	9452633	0.011009
BIN0679	Chr8	30.6965	9452633	9471885	0.019252
BIN0680	Chr8	31.9546	9471885	10323820	0.851935
BIN0681	Chr8	32.7915	10323820	13311988	2.98817
BIN0682	Chr8	33.6283	13311988	13373733	0.061745
BIN0683	Chr8	34.0458	13373733	14224524	0.850791
BIN0684	Chr8	46.6345	14224524	14304088	0.079564
BIN0685	Chr8	48.7391	14304088	14324729	0.020641
BIN0686	Chr8	49.5757	14324729	14485303	0.160574
BIN0687	Chr8	49.9932	14485303	14493157	0.007854
BIN0688	Chr8	50.83	14493157	14652930	0.159773
BIN0689	Chr8	51.6668	14652930	14851776	0.198846
BIN0690	Chr8	52.5035	14851776	14888525	0.036749
BIN0691	Chr8	53.7614	14888525	14985695	0.09717
BIN0692	Chr8	54.1789	14985695	15050035	0.06434
BIN0693	Chr8	55.437	15050035	15052099	0.002064
BIN0694	Chr8	55.8546	15052099	15228332	0.176233
BIN0695	Chr8	56.2721	15228332	15799416	0.571084
BIN0696	Chr8	58.3786	15799416	15826593	0.027177
BIN0697	Chr8	59.2155	15826593	17556952	1.73036
BIN0698	Chr8	62.1798	17556952	17687261	0.130309
BIN0699	Chr8	63.4382	17687261	17698451	0.01119
BIN0700	Chr8	63.8558	17698451	17923572	0.225121
BIN0701	Chr8	65.1143	17923572	17947911	0.024339
BIN0702	Chr8	65.5319	17947911	18188728	0.240817
BIN0703	Chr8	67.2145	18188728	18191110	0.002382
BIN0704	Chr8	67.6321	18191110	18714094	0.522984
BIN0705	Chr8	70.1675	18714094	18993123	0.279029
BIN0706	Chr8	71.8484	18993123	22648300	3.65518
BIN0707	Chr8	88.2112	22648300	23161770	0.51347
BIN0708	Chr8	89.4688	23161770	23265526	0.103756
BIN0709	Chr8	89.8863	23265526	23351425	0.085899
BIN0710	Chr8	90.3037	23351425	23553667	0.202242
BIN0711	Chr8	90.7212	23553667	23604241	0.050574
BIN0712	Chr8	91.558	23604241	23766325	0.162084
BIN0713	Chr8	91.9755	23766325	23979705	0.21338
BIN0714	Chr8	92.393	23979705	24074857	0.095152
BIN0715	Chr8	93.6509	24074857	24184248	0.109391
BIN0716	Chr8	94.4879	24184248	24356419	0.172171
BIN0717	Chr8	94.9054	24356419	24644537	0.288118
BIN0718	Chr8	95.3229	24644537	26149438	1.5049
BIN0719	Chr9	0	1305009	2493649	1.18864
BIN0720	Chr9	0.836973	2493649	2754020	0.260371
BIN0721	Chr9	4.23293	2754020	3105858	0.351838
BIN0722	Chr9	5.49104	3105858	3125873	0.020015
BIN0723	Chr9	6.32795	3125873	3180061	0.054188
BIN0724	Chr9	6.74548	3180061	3276704	0.096643
BIN0725	Chr9	7.16299	3276704	3319700	0.042996
BIN0726	Chr9	7.99972	3319700	3351521	0.031821
BIN0727	Chr9	9.25756	3351521	3493869	0.142348
BIN0728	Chr9	9.67504	3493869	3525422	0.031553
BIN0729	Chr9	10.0925	3525422	3559543	0.034121
BIN0730	Chr9	10.9291	3559543	3684289	0.124746
BIN0731	Chr9	11.3466	3684289	3687005	0.002716
BIN0732	Chr9	11.7641	3687005	3726632	0.039627
BIN0733	Chr9	12.1815	3726632	3744695	0.018063
BIN0734	Chr9	13.8617	3744695	4250796	0.506101
BIN0735	Chr9	14.6984	4250796	4257844	0.007048
BIN0736	Chr9	15.535	4257844	4423026	0.165182
BIN0737	Chr9	15.9525	4423026	4425195	0.002169
BIN0738	Chr9	16.3699	4425195	4637904	0.212709
BIN0739	Chr9	17.2065	4637904	4694381	0.056477
BIN0740	Chr9	17.6239	4694381	4762040	0.067659
BIN0741	Chr9	18.0414	4762040	4779964	0.017924
BIN0742	Chr9	18.8779	4779964	4790007	0.010043
BIN0743	Chr9	19.2953	4790007	4852052	0.062045
BIN0744	Chr9	20.1318	4852052	4918429	0.066377
BIN0745	Chr9	20.5492	4918429	5169629	0.2512
BIN0746	Chr9	21.3856	5169629	5253248	0.083619
BIN0747	Chr9	24.3435	5253248	5295247	0.041999
BIN0748	Chr9	24.761	5295247	5332482	0.037235
BIN0749	Chr9	25.1785	5332482	5523387	0.190905
BIN0750	Chr9	26.015	5523387	5705877	0.18249
BIN0751	Chr9	27.6944	5705877	5800264	0.094387
BIN0752	Chr9	28.1118	5800264	6071423	0.271159
BIN0753	Chr9	28.9483	6071423	6214308	0.142885
BIN0754	Chr9	29.3657	6214308	6224201	0.009893
BIN0755	Chr9	29.7832	6224201	6232407	0.008206
BIN0756	Chr9	30.2006	6232407	6324938	0.092531
BIN0757	Chr9	31.0371	6324938	6363687	0.038749
BIN0758	Chr9	32.2947	6363687	6375467	0.01178
BIN0759	Chr9	32.7122	6375467	6471912	0.096445
BIN0760	Chr9	33.9698	6471912	6808754	0.336842
BIN0761	Chr9	34.8066	6808754	6815487	0.006733
BIN0762	Chr9	35.6436	6815487	6835596	0.020109
BIN0763	Chr9	36.9019	6835596	6999611	0.164015
BIN0764	Chr9	37.3195	6999611	7093254	0.093643
BIN0765	Chr9	38.578	7093254	7582587	0.489333
BIN0766	Chr9	38.9956	7582587	7726957	0.14437
BIN0767	Chr9	40.2543	7726957	7771330	0.044373
BIN0768	Chr9	41.0914	7771330	7840506	0.069176
BIN0769	Chr9	42.7741	7840506	7846487	0.005981
BIN0770	Chr9	44.4565	7846487	8519923	0.673436
BIN0771	Chr9	47.424	8519923	8546959	0.027036
BIN0772	Chr9	48.2614	8546959	8594941	0.047982
BIN0773	Chr9	48.6791	8594941	8661459	0.066518
BIN0774	Chr9	49.0967	8661459	8716338	0.054879
BIN0775	Chr9	49.5143	8716338	9143792	0.427454
BIN0776	Chr9	50.7728	9143792	9622892	0.4791
BIN0777	Chr9	52.4543	9622892	9657355	0.034463
BIN0778	Chr9	53.2912	9657355	10325380	0.668025
BIN0779	Chr9	56.6903	10325380	10345798	0.020418
BIN0780	Chr9	57.108	10345798	10357168	0.01137
BIN0781	Chr9	57.5256	10357168	10407379	0.050211
BIN0782	Chr9	57.9432	10407379	10561164	0.153785
BIN0783	Chr9	59.6259	10561164	10859180	0.298016
BIN0784	Chr9	62.1641	10859180	10955757	0.096577
BIN0785	Chr9	62.5818	10955757	10965109	0.009352
BIN0786	Chr9	62.9994	10965109	11357579	0.39247
BIN0787	Chr9	64.2584	11357579	11502012	0.144433
BIN0788	Chr9	65.0956	11502012	11563841	0.061829
BIN0789	Chr9	65.5132	11563841	11607138	0.043297
BIN0790	Chr9	65.9309	11607138	11782055	0.174917
BIN0791	Chr9	66.3485	11782055	11813232	0.031177
BIN0792	Chr9	66.7662	11813232	11917270	0.104038
BIN0793	Chr9	67.1839	11917270	12038687	0.121417
BIN0794	Chr9	67.6016	12038687	12320529	0.281842
BIN0795	Chr9	68.0193	12320529	12393109	0.07258
BIN0796	Chr9	68.8568	12393109	12525673	0.132564
BIN0797	Chr9	69.2745	12525673	14018898	1.49323
BIN0798	Chr9	74.915	14018898	14050644	0.031746
BIN0799	Chr9	75.3328	14050644	14066850	0.016206
BIN0800	Chr9	78.7471	14066850	14540280	0.47343
BIN0801	Chr9	79.1648	14540280	14545154	0.004874
BIN0802	Chr9	81.2769	14545154	14876591	0.331437
BIN0803	Chr9	81.6947	14876591	15034088	0.157497
BIN0804	Chr9	82.1124	15034088	16411933	1.37784
BIN0805	Chr9	82.5301	16411933	16428259	0.016326
BIN0806	Chr9	83.79	16428259	16807360	0.379101
BIN0807	Chr9	84.6277	16807360	16813191	0.005831
BIN0808	Chr9	85.0454	16813191	18778158	1.96497
BIN0809	Chr9	85.883	18778158	18929917	0.151759
BIN0810	Chr9	86.3007	18929917	19185756	0.255839
BIN0811	Chr9	86.7184	19185756	19279607	0.093851
BIN0812	Chr9	87.1361	19279607	19771813	0.492206
BIN0813	Chr9	95.0564	19771813	19857236	0.085423
BIN0814	Chr9	98.0247	19857236	19864048	0.006812
BIN0815	Chr9	100.561	19864048	19867914	0.003866
BIN0816	Chr9	105.724	19867914	20353398	0.485484
BIN0817	Chr9	106.141	20353398	20736951	0.383553
BIN0818	Chr9	106.559	20736951	21638209	0.901258
BIN0819	Chr9	106.976	21638209	21679921	0.041712
BIN0820	Chr9	107.814	21679921	24797298	3.11738
BIN0821	Chr9	113.419	24797298	24979309	0.182011
BIN0822	Chr9	119.491	24979309	26290627	1.31132
BIN0823	Chr9	121.176	26290627	26304835	0.014208
BIN0824	Chr9	122.013	26304835	26348727	0.043892
BIN0825	Chr9	122.851	26348727	26818264	0.469537
BIN0826	Chr9	123.269	26818264	26931502	0.113238
BIN0827	Chr9	123.686	26931502	27100715	0.169213
BIN0828	Chr9	124.524	27100715	27140387	0.039672
BIN0829	Chr9	124.942	27140387	27160255	0.019868
BIN0830	Chr9	125.36	27160255	27371811	0.211556
BIN0831	Chr9	125.777	27371811	27571863	0.200052
BIN0832	Chr9	126.195	27571863	27896725	0.324862
BIN0833	Chr9	126.613	27896725	28806116	0.909391
BIN0834	Chr9	128.725	28806116	28862003	0.055887
BIN0835	Chr9	129.562	28862003	32308552	3.44655
BIN0836	Chr9	133.416	32308552	33670316	1.36176
BIN0837	Chr9	137.715	33670316	34028129	0.357813
BIN0838	Chr9	138.553	34028129	34986854	0.958725
BIN0839	Chr10	0	853705	2524567	1.67086
BIN0840	Chr10	0.417644	2524567	2753694	0.229127
BIN0841	Chr10	1.25498	2753694	2770085	0.016391
BIN0842	Chr10	2.09231	2770085	13462854	10.6928
BIN0843	Chr10	15.5806	13462854	14247228	0.784374
BIN0844	Chr10	18.5473	14247228	14312371	0.065143
BIN0845	Chr10	18.9649	14312371	14562248	0.249877
BIN0846	Chr10	19.3824	14562248	14582057	0.019809
BIN0847	Chr10	20.2193	14582057	14732160	0.150103
BIN0848	Chr10	21.4774	14732160	14862272	0.130112
BIN0849	Chr10	21.895	14862272	14878520	0.016248
BIN0850	Chr10	22.3125	14878520	14889501	0.010981
BIN0851	Chr10	22.73	14889501	14967326	0.077825
BIN0852	Chr10	23.1475	14967326	15038553	0.071227
BIN0853	Chr10	23.565	15038553	15070530	0.031977
BIN0854	Chr10	23.9825	15070530	15080924	0.010394
BIN0855	Chr10	24.4	15080924	15112950	0.032026
BIN0856	Chr10	24.8175	15112950	15535756	0.422806
BIN0857	Chr10	26.0749	15535756	16374708	0.838952
BIN0858	Chr10	26.9115	16374708	16381194	0.006486
BIN0859	Chr10	30.3053	16381194	17259713	0.878519
BIN0860	Chr10	30.7229	17259713	17261739	0.002026
BIN0861	Chr10	31.5598	17261739	17303179	0.04144
BIN0862	Chr10	31.9773	17303179	17306046	0.002867
BIN0863	Chr10	32.3948	17306046	17398548	0.092502
BIN0864	Chr10	33.6528	17398548	17430203	0.031655
BIN0865	Chr10	34.9112	17430203	17463384	0.033181
BIN0866	Chr10	35.3288	17463384	17609408	0.146024
BIN0867	Chr10	35.7464	17609408	17684806	0.075398
BIN0868	Chr10	36.164	17684806	17711244	0.026438
BIN0869	Chr10	36.5816	17711244	17782129	0.070885
BIN0870	Chr10	37.4188	17782129	17834921	0.052792
BIN0871	Chr10	38.2561	17834921	17876993	0.042072
BIN0872	Chr10	39.5152	17876993	19755039	1.87805
BIN0873	Chr10	47.4016	19755039	20106852	0.351813
BIN0874	Chr10	48.6596	20106852	20156867	0.050015
BIN0875	Chr10	51.6247	20156867	20166493	0.009626
BIN0876	Chr10	52.0423	20166493	20207221	0.040728
BIN0877	Chr10	52.8792	20207221	20251776	0.044555
BIN0878	Chr10	53.7163	20251776	20405386	0.15361
BIN0879	Chr10	54.5532	20405386	20480014	0.074628
BIN0880	Chr10	54.9708	20480014	20541828	0.061814
BIN0881	Chr10	55.3883	20541828	20648932	0.107104
BIN0882	Chr10	55.8059	20648932	20812971	0.164039
BIN0883	Chr10	56.2234	20812971	20814447	0.001476
BIN0884	Chr10	56.641	20814447	20850637	0.03619
BIN0885	Chr10	57.0586	20850637	20865076	0.014439
BIN0886	Chr10	57.4761	20865076	21035207	0.170131
BIN0887	Chr10	58.313	21035207	21374429	0.339222
BIN0888	Chr10	59.5713	21374429	21378580	0.004151
BIN0889	Chr10	59.9888	21378580	21464170	0.08559
BIN0890	Chr10	60.4064	21464170	21523801	0.059631
BIN0891	Chr10	61.2435	21523801	21985951	0.46215
BIN0892	Chr10	63.3504	21985951	21990282	0.004331
BIN0893	Chr10	63.7679	21990282	22078360	0.088078
BIN0894	Chr10	64.1855	22078360	22347588	0.269228
BIN0895	Chr10	65.0224	22347588	22534220	0.186632
BIN0896	Chr10	65.44	22534220	22541153	0.006933
BIN0897	Chr10	65.8575	22541153	22755368	0.214215
BIN0898	Chr10	66.6945	22755368	28419553	5.66418
BIN0899	Chr11	0	2406345	5516229	3.10988
BIN0900	Chr11	0.417467	5516229	6220363	0.704134
BIN0901	Chr11	2.52204	6220363	6228566	0.008203
BIN0902	Chr11	4.20197	6228566	6353424	0.124858
BIN0903	Chr11	4.61944	6353424	6549307	0.195883
BIN0904	Chr11	5.45599	6549307	6625381	0.076074
BIN0905	Chr11	5.87345	6625381	9771792	3.14641
BIN0906	Chr11	9.69634	9771792	10878993	1.1072
BIN0907	Chr11	13.0891	10878993	10902964	0.023971
BIN0908	Chr11	14.7708	10902964	10936054	0.03309
BIN0909	Chr11	18.1699	10936054	10955657	0.019603
BIN0910	Chr11	18.5876	10955657	11023789	0.068132
BIN0911	Chr11	19.0052	11023789	11358620	0.334831
BIN0912	Chr11	19.4229	11358620	11580047	0.221427
BIN0913	Chr11	19.8405	11580047	11638885	0.058838
BIN0914	Chr11	20.2582	11638885	11685553	0.046668
BIN0915	Chr11	20.6758	11685553	12699370	1.01382
BIN0916	Chr11	24.9537	12699370	12745691	0.046321
BIN0917	Chr11	25.3713	12745691	13054638	0.308947
BIN0918	Chr11	26.2088	13054638	13105105	0.050467
BIN0919	Chr11	26.6265	13105105	13373512	0.268407
BIN0920	Chr11	27.0441	13373512	13523459	0.149947
BIN0921	Chr11	27.4618	13523459	13551147	0.027688
BIN0922	Chr11	27.8795	13551147	13622489	0.071342
BIN0923	Chr11	28.2971	13622489	14052118	0.429629
BIN0924	Chr11	28.7147	14052118	14194034	0.141916
BIN0925	Chr11	30.8244	14194034	14223119	0.029085
BIN0926	Chr11	31.2421	14223119	14410950	0.187831
BIN0927	Chr11	32.9252	14410950	14592997	0.182047
BIN0928	Chr11	33.7626	14592997	15069488	0.476491
BIN0929	Chr11	35.8723	15069488	15102701	0.033213
BIN0930	Chr11	36.7095	15102701	15162396	0.059695
BIN0931	Chr11	37.5468	15162396	15184162	0.021766
BIN0932	Chr11	38.384	15184162	15206575	0.022413
BIN0933	Chr11	38.8017	15206575	15261211	0.054636
BIN0934	Chr11	40.0605	15261211	15313819	0.052608
BIN0935	Chr11	40.478	15313819	15334359	0.02054
BIN0936	Chr11	41.7367	15334359	15352142	0.017783
BIN0937	Chr11	43.4194	15352142	15805412	0.45327
BIN0938	Chr11	46.3869	15805412	15866232	0.06082
BIN0939	Chr11	46.8045	15866232	15958422	0.09219
BIN0940	Chr11	47.2221	15958422	16074686	0.116264
BIN0941	Chr11	47.6397	16074686	16083562	0.008876
BIN0942	Chr11	48.0573	16083562	16313809	0.230247
BIN0943	Chr11	48.4749	16313809	16573895	0.260086
BIN0944	Chr11	48.8925	16573895	16585889	0.011994
BIN0945	Chr11	49.3101	16585889	16589349	0.00346
BIN0946	Chr11	49.7276	16589349	16955332	0.365983
BIN0947	Chr11	50.9857	16955332	17115857	0.160525
BIN0948	Chr11	51.8225	17115857	17127152	0.011295
BIN0949	Chr11	52.24	17127152	17514911	0.387759
BIN0950	Chr11	53.921	17514911	17578311	0.0634
BIN0951	Chr11	55.1788	17578311	17592273	0.013962
BIN0952	Chr11	55.5963	17592273	17742120	0.149847
BIN0953	Chr11	56.0138	17742120	17986956	0.244836
BIN0954	Chr11	57.2718	17986956	18162778	0.175822
BIN0955	Chr11	60.2361	18162778	18168319	0.005541
BIN0956	Chr11	60.6536	18168319	18177604	0.009285
BIN0957	Chr11	63.1861	18177604	18185622	0.008018
BIN0958	Chr11	63.6036	18185622	18239971	0.054349
BIN0959	Chr11	65.2845	18239971	18262951	0.02298
BIN0960	Chr11	65.702	18262951	18519983	0.257032
BIN0961	Chr11	66.1195	18519983	18734133	0.21415
BIN0962	Chr11	66.537	18734133	18819619	0.085486
BIN0963	Chr11	67.7944	18819619	19455466	0.635847
BIN0964	Chr11	70.3251	19455466	19566798	0.111332
BIN0965	Chr11	70.7426	19566798	19694497	0.127699
BIN0966	Chr11	71.5794	19694497	19718731	0.024234
BIN0967	Chr11	72.4161	19718731	19720937	0.002206
BIN0968	Chr11	73.6742	19720937	19797931	0.076994
BIN0969	Chr11	74.0917	19797931	19970077	0.172146
BIN0970	Chr11	74.9287	19970077	20127895	0.157818
BIN0971	Chr11	76.1871	20127895	20654956	0.527061
BIN0972	Chr11	77.0241	20654956	20731541	0.076585
BIN0973	Chr11	77.4417	20731541	21016488	0.284947
BIN0974	Chr11	80.8409	21016488	21163206	0.146718
BIN0975	Chr11	92.6674	21163206	21169040	0.005834
BIN0976	Chr11	97.8272	21169040	21183274	0.014234
BIN0977	Chr11	98.2448	21183274	21196018	0.012744
BIN0978	Chr11	99.9273	21196018	21202033	0.006015
BIN0979	Chr11	100.345	21202033	21231857	0.029824
BIN0980	Chr11	103.746	21231857	21242322	0.010465
BIN0981	Chr11	104.583	21242322	21247884	0.005562
BIN0982	Chr11	105.842	21247884	21344157	0.096273
BIN0983	Chr11	106.68	21344157	21379073	0.034916
BIN0984	Chr11	107.517	21379073	21539113	0.16004
BIN0985	Chr11	107.934	21539113	22388044	0.848931
BIN0986	Chr11	110.903	22388044	23149511	0.761467
BIN0987	Chr11	111.74	23149511	23190928	0.041417
BIN0988	Chr11	112.577	23190928	23301622	0.110694
BIN0989	Chr11	113.415	23301622	23327364	0.025742
BIN0990	Chr11	113.832	23327364	23499565	0.172201
BIN0991	Chr11	114.67	23499565	23643010	0.143445
BIN0992	Chr11	115.087	23643010	23753716	0.110706
BIN0993	Chr11	115.505	23753716	24209460	0.455744
BIN0994	Chr11	115.923	24209460	24229523	0.020063
BIN0995	Chr11	116.34	24229523	24232668	0.003145
BIN0996	Chr11	116.758	24232668	24248026	0.015358
BIN0997	Chr11	117.175	24248026	24360249	0.112223
BIN0998	Chr11	118.434	24360249	24806303	0.446054
BIN0999	Chr11	119.271	24806303	24938076	0.131773
BIN1000	Chr11	120.108	24938076	25318552	0.380476
BIN1001	Chr11	122.216	25318552	25501852	0.1833
BIN1002	Chr11	123.052	25501852	25538280	0.036428
BIN1003	Chr11	123.889	25538280	26514621	0.976341
BIN1004	Chr11	127.29	26514621	27106780	0.592159
The values in red were large gaps (>2 Mbp) on the genetic map.
